# Supplementary material for: Exploring factors associated with hepatitis B screening in a multilingual and diverse population
Source: Springer Nature journal article supplement (doi:10.1186/s12913-022-07813-w), 2022-04-11
Supplement: MOESM2 [file 20302212]

**Appendix B:** Health Behavior Framework<sup>a</sup> describes individual variables; provider and health care system factors; and individual, system, and societal barriers and supports for hepatitis B screening

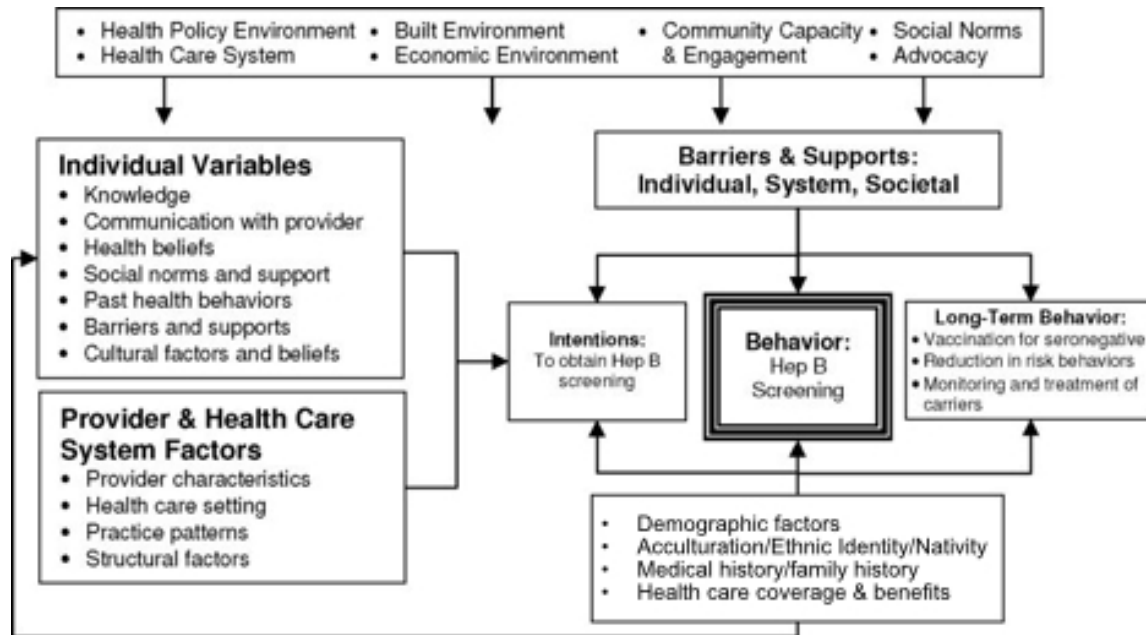

<sup>a</sup>Adapted from: Bastani R, Glenn BA, Taylor VM, Chen MS Jr, Nguyen TT, Stewart SL, Maxwell AE. Integrating theory into community interventions to reduce liver cancer disparities: The Health Behavior Framework. *Prev Med.* 2010 Jan-Feb;50(1-2):63-7. doi: 10.1016/j.ypmed.2009.08.010. Epub 2009 Aug 27.
